# Supplementary material
Source: PubMed Central journal article supplement (PMC5927975)
Supplement: 2018_190884-Disclosure.pdf [file 2018_190884-Disclosure.pdf]

Haematologica  
HAEMATOL/2018/190884  
Version 1  
(AUTO-)IMMUNE SIGNATURE IN APLASTIC ANEMIA

Antonio Maria Risitano

Disclosures: The author received lecture fees and serves as member of an investigator board for Alexion, Pfizer and Novartis.
